# Supplementary material for: Firearm Access and Suicidal Crises Among Young Adults Experiencing Homelessness in the United States
Source: Atypon-hosted journal article supplement (doi:10.1027/0227-5910/a000722), 2020-10-09
Supplement: 0227-5910_a000722_esm1.pdf [file 0227-5910_a000722_esm1.pdf]

ESM 1.

*Detailed Measures for Variables in Study Entitled, “Firearm Access and Suicidal Crises among Young Adults Experiencing Homelessness in the United States: A Lethal Intersection”*

| <b>Variables</b>  | <b>Items (#)</b> | <b>Measures</b>                                                                           | <b>Variable Coding</b> | <b>Source/Reference</b>                                                                                                                                                                                                                                                                                                                                                                                                                                                                                                        |
|-------------------|------------------|-------------------------------------------------------------------------------------------|------------------------|--------------------------------------------------------------------------------------------------------------------------------------------------------------------------------------------------------------------------------------------------------------------------------------------------------------------------------------------------------------------------------------------------------------------------------------------------------------------------------------------------------------------------------|
| Firearm access    | 1                | Do you have access to a gun or know how to access a gun easily?                           | 0= No<br>1= Yes        | For similar item, see: Cretacci, M., & Hendrix, N. (2017). Close range: Adolescent predictors of adult firearms ownership in the United States. <i>International Journal of Criminal Justice Sciences</i> , 12(2), 285–301.                                                                                                                                                                                                                                                                                                    |
| Suicidal ideation | 1                | At any time in the past 12 months, did you seriously think about trying to kill yourself? | 0= No<br>1= Yes        | Adapted from: Centers for Disease Control and Prevention. (2015). Youth Risk Behavior Survey Questionnaire. Retrieved from <a href="http://www.cdc.gov/yrbs">www.cdc.gov/yrbs</a><br><br>For similar item, see: Center for Behavioral Health Statistics and Quality. (2017). <i>2016 National Survey on Drug Use and Health: Methodological summary and definitions</i> . Rockville, MD: Substance Abuse and Mental Health Services Administration. Retrieved from <a href="https://www.samhsa.gov">https://www.samhsa.gov</a> |
| Suicide attempt   | 1                | During the past 12 months, did you try to kill yourself?                                  | 0= No<br>1= Yes        | Adapted from: Centers for Disease Control and Prevention. (2015). Youth Risk Behavior Survey Questionnaire. Retrieved from <a href="http://www.cdc.gov/yrbs">www.cdc.gov/yrbs</a><br><br>For similar item, see: Center for                                                                                                                                                                                                                                                                                                     |

|                                        |   |                                                                                        |                                                                                                                                                                                                                                                                                                                                                                                                                        |                                                                                                                                                                                                                                                                                                     |
|----------------------------------------|---|----------------------------------------------------------------------------------------|------------------------------------------------------------------------------------------------------------------------------------------------------------------------------------------------------------------------------------------------------------------------------------------------------------------------------------------------------------------------------------------------------------------------|-----------------------------------------------------------------------------------------------------------------------------------------------------------------------------------------------------------------------------------------------------------------------------------------------------|
|                                        |   |                                                                                        |                                                                                                                                                                                                                                                                                                                                                                                                                        | Behavioral Health Statistics and Quality. (2017). <i>2016 National Survey on Drug Use and Health: Methodological summary and definitions</i> . Rockville, MD: Substance Abuse and Mental Health Services Administration. Retrieved from <a href="https://www.samhsa.gov">https://www.samhsa.gov</a> |
| Homeless condition                     | 1 | Where did you sleep last night?                                                        | 1= Housing program (i.e., youth shelter, adult shelter, transitional living programs, own apartment with housing voucher support)<br>2= Couch surfing (i.e., could stay no more than 30 days in family homes, foster family homes, relatives' homes, friend's homes, partner homes)<br>3= Literal homelessness (i.e., street, park, beach, outside, abandoned building, car, bus, or other vehicles or transportation) | For similar item, see: Petering, R., Rhoades, H., Winetrobe, H., Dent, D., & Rice, E. (2017). Violence, trauma, mental health, and substance use among homeless youth Juggalos. <i>Child Psychiatry &amp; Human Development, 48</i> (4), 642-650.                                                   |
| Duration of homelessness               | 1 | How long have you been without a stable place to stay/homeless in your whole lifetime? | 0= Less than 2 years<br>1= 2 years or more                                                                                                                                                                                                                                                                                                                                                                             | For similar item, see: Petering, R., Rhoades, H., Winetrobe, H., Dent, D., & Rice, E. (2017). Violence, trauma, mental health, and substance use among homeless youth Juggalos. <i>Child Psychiatry &amp; Human Development, 48</i> (4), 642-650.                                                   |
| Lifetime foster care system engagement | 1 | Have you ever been foster care?                                                        | 0= No<br>1= Yes                                                                                                                                                                                                                                                                                                                                                                                                        | For similar item, see: Yoshioka-Maxwell, A., Rice, E., Rhoades, H., & Winetrobe, H. (2015). Methamphetamine use among homeless former foster youth: The mediating role of social networks. <i>Journal of Alcoholism and Drug Dependence, 3</i> (2).                                                 |

|                                               |    |                                                                                                                                                                                                                                                                                                                                                                                                                                                                                |                                                                                                                                                                       |                                                                                                                                                                                                                                                                                                                                                          |
|-----------------------------------------------|----|--------------------------------------------------------------------------------------------------------------------------------------------------------------------------------------------------------------------------------------------------------------------------------------------------------------------------------------------------------------------------------------------------------------------------------------------------------------------------------|-----------------------------------------------------------------------------------------------------------------------------------------------------------------------|----------------------------------------------------------------------------------------------------------------------------------------------------------------------------------------------------------------------------------------------------------------------------------------------------------------------------------------------------------|
| Lifetime correctional system engagement       | 3  | Have you ever been involved with the juvenile justice system?<br>Have you ever been arrested?<br>Have you ever been in jail or prison?                                                                                                                                                                                                                                                                                                                                         | 0= No to all three items<br>1= Yes to any of the three items                                                                                                          | For similar items, see: Fulginiti, A., Rice, E., Hsu, H. T., Rhoades, H., & Winetrobe, H. (2016). Risky integration. A social network analysis of network position, exposure, and suicidal ideation among homeless youth. <i>Crisis, 37</i> , 184-193. <a href="https://doi.org/10.1027/0227-5910/a000374">https://doi.org/10.1027/0227-5910/a000374</a> |
| Lifetime mental/behavioral health service use | 3  | Have you ever received any outpatient treatment or counseling for any problem you were having with your emotions, nerves, or mental health?<br>Have you ever received treatment for any problem you were having with your emotions, nerves or mental health in an emergency room?<br>Have you ever stayed overnight or longer in a hospital or other facility to receive treatment or counseling for any problem you were having with your emotions, nerves, or mental health? | 0= No to all three items<br>1= Yes to any of the three items                                                                                                          | Adapted from: Center for Behavioral Health Statistics and Quality. (2017). <i>2016 National Survey on Drug Use and Health: Methodological summary and definitions</i> . Rockville, MD: Substance Abuse and Mental Health Services Administration. Retrieved from <a href="https://www.samhsa.gov">https://www.samhsa.gov</a> .                           |
| Adverse childhood experiences <sup>a</sup>    | 10 | Sample item: Did a parent or other adult in the household often swear at you, insult you, put you down, or humiliate you or act in a way that made you afraid that you might be physically hurt?)                                                                                                                                                                                                                                                                              | 0= No<br>1= Yes<br><br>Dichotomous responses were used to create a sum score. The internal reliability (i.e., Cronbach's alpha) for the measure in this study is .81. | Adverse Childhood Experiences Scale. Felitti, V. J., Anda, R. F., Nordenberg, D., Williamson, D. F., Spitz, A. M., Edwards, V., ... & Marks, J. S. (1998). Relationship of Childhood Abuse and Household Dysfunction to Many of the Leading Causes of Death in Adults. <i>American Journal of Preventive Medicine, 14</i> (4), 245-258.                  |
| Lifetime street victimization                 | 9  | Did anyone use force to take something away from you that you were carrying or wearing?<br>Did anyone hit or attack you on purpose with an object or weapon?<br>Did anyone hit or attacked you without using an object or weapon?<br>Did someone threatened to hurt you when you thought they might really do it?                                                                                                                                                              | 0= No to all of the items<br>1= Yes to any of the items                                                                                                               | Adapted Juvenile victimization questionnaire (JVQ); Finkelhor, D., Hamby, S. L., Ormrod, R., & Turner, H. (2005). The Juvenile Victimization Questionnaire: reliability, validity, and national norms. <i>Child Abuse &amp; Neglect, 29</i> (4), 383-412.                                                                                                |

|                                |   |                                                                                                                                                                                                                                                                                                                                                                                                                                  |                                                                                                   |                                                                                                                                                             |
|--------------------------------|---|----------------------------------------------------------------------------------------------------------------------------------------------------------------------------------------------------------------------------------------------------------------------------------------------------------------------------------------------------------------------------------------------------------------------------------|---------------------------------------------------------------------------------------------------|-------------------------------------------------------------------------------------------------------------------------------------------------------------|
|                                |   | <p>Did a gang hit, jump, or attack you?</p> <p>Did you SEE anyone get attacked on purpose?</p> <p>Did a romantic partner ever hit, push, shove, punch, kick or physically hurt you on purpose?</p> <p>Did anyone try to force you to have sex; that is, sexual intercourse of any kind, even if it didn't happen?</p> <p>Did anyone touch your private parts when they shouldn't have or make you touch their private parts?</p> |                                                                                                   |                                                                                                                                                             |
| Lifetime psychiatric diagnosis | 1 | Has a doctor or mental health provider ever diagnosed you with attention deficit hyperactivity disorder (ADHD), post-Traumatic stress disorder (PTSD), oppositional defiant or conduct disorder (ODCD), major depression, or schizophrenia or schizoaffective disorder?                                                                                                                                                          | <p>0= No to all these mental health issues</p> <p>1= Yes to any of these mental health issues</p> | Informed by the Houston Youth Count, as cited in Narendorf, S., Santa Maria, D. & Cooper, J. (2015). YouthCount 2.0!: Full report of findings. Houston, TX. |
